# Supplementary material
Source: publisher figshare collection journal article supplement (https://brill.figshare.com/ndownloader/files/11874626)
Supplement: Supplementary file 1 [file 11874626]

# **An Illusory Contour Can Facilitate Visually Induced Self-Motion Perception**

**Shinji Nakamura <sup>1,\*</sup> and Shin'ya Takahashi <sup>2</sup>**

<sup>1</sup> Inter-departmental Education Center, Nihon Fukushi University, Japan

<sup>2</sup> School of Psychology, Tokai Gakuen University, Japan

Received 28 December 2017; accepted 27 May 2018

\* To whom correspondence should be addressed. E-mail: [shinji@n-fukushi.ac.jp](mailto:shinji@n-fukushi.ac.jp)

**Supplementary Material**

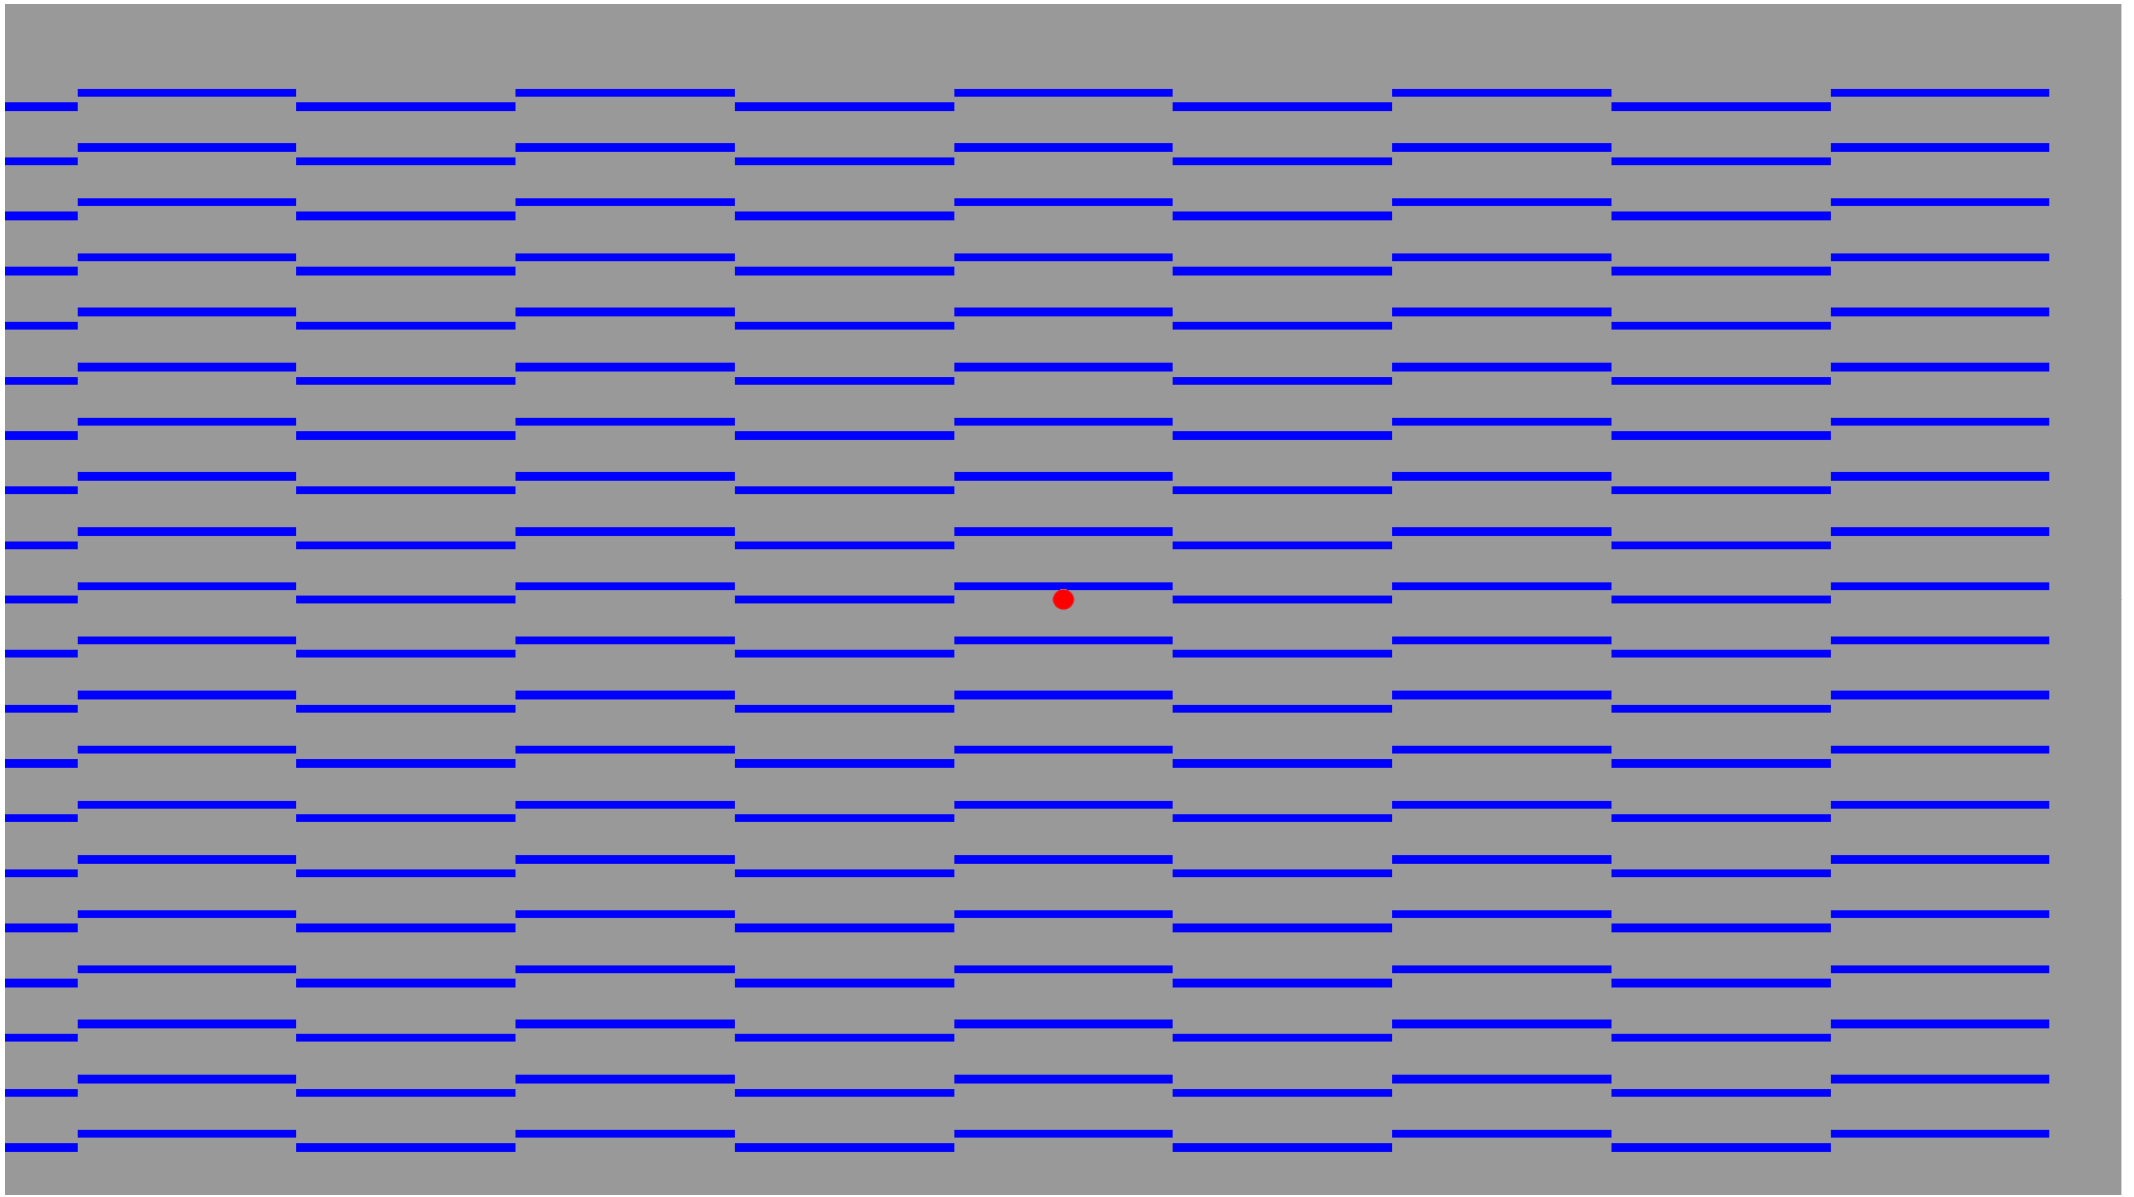

with illusory contour  
Line length: 10 degree  
Number of Line: 20

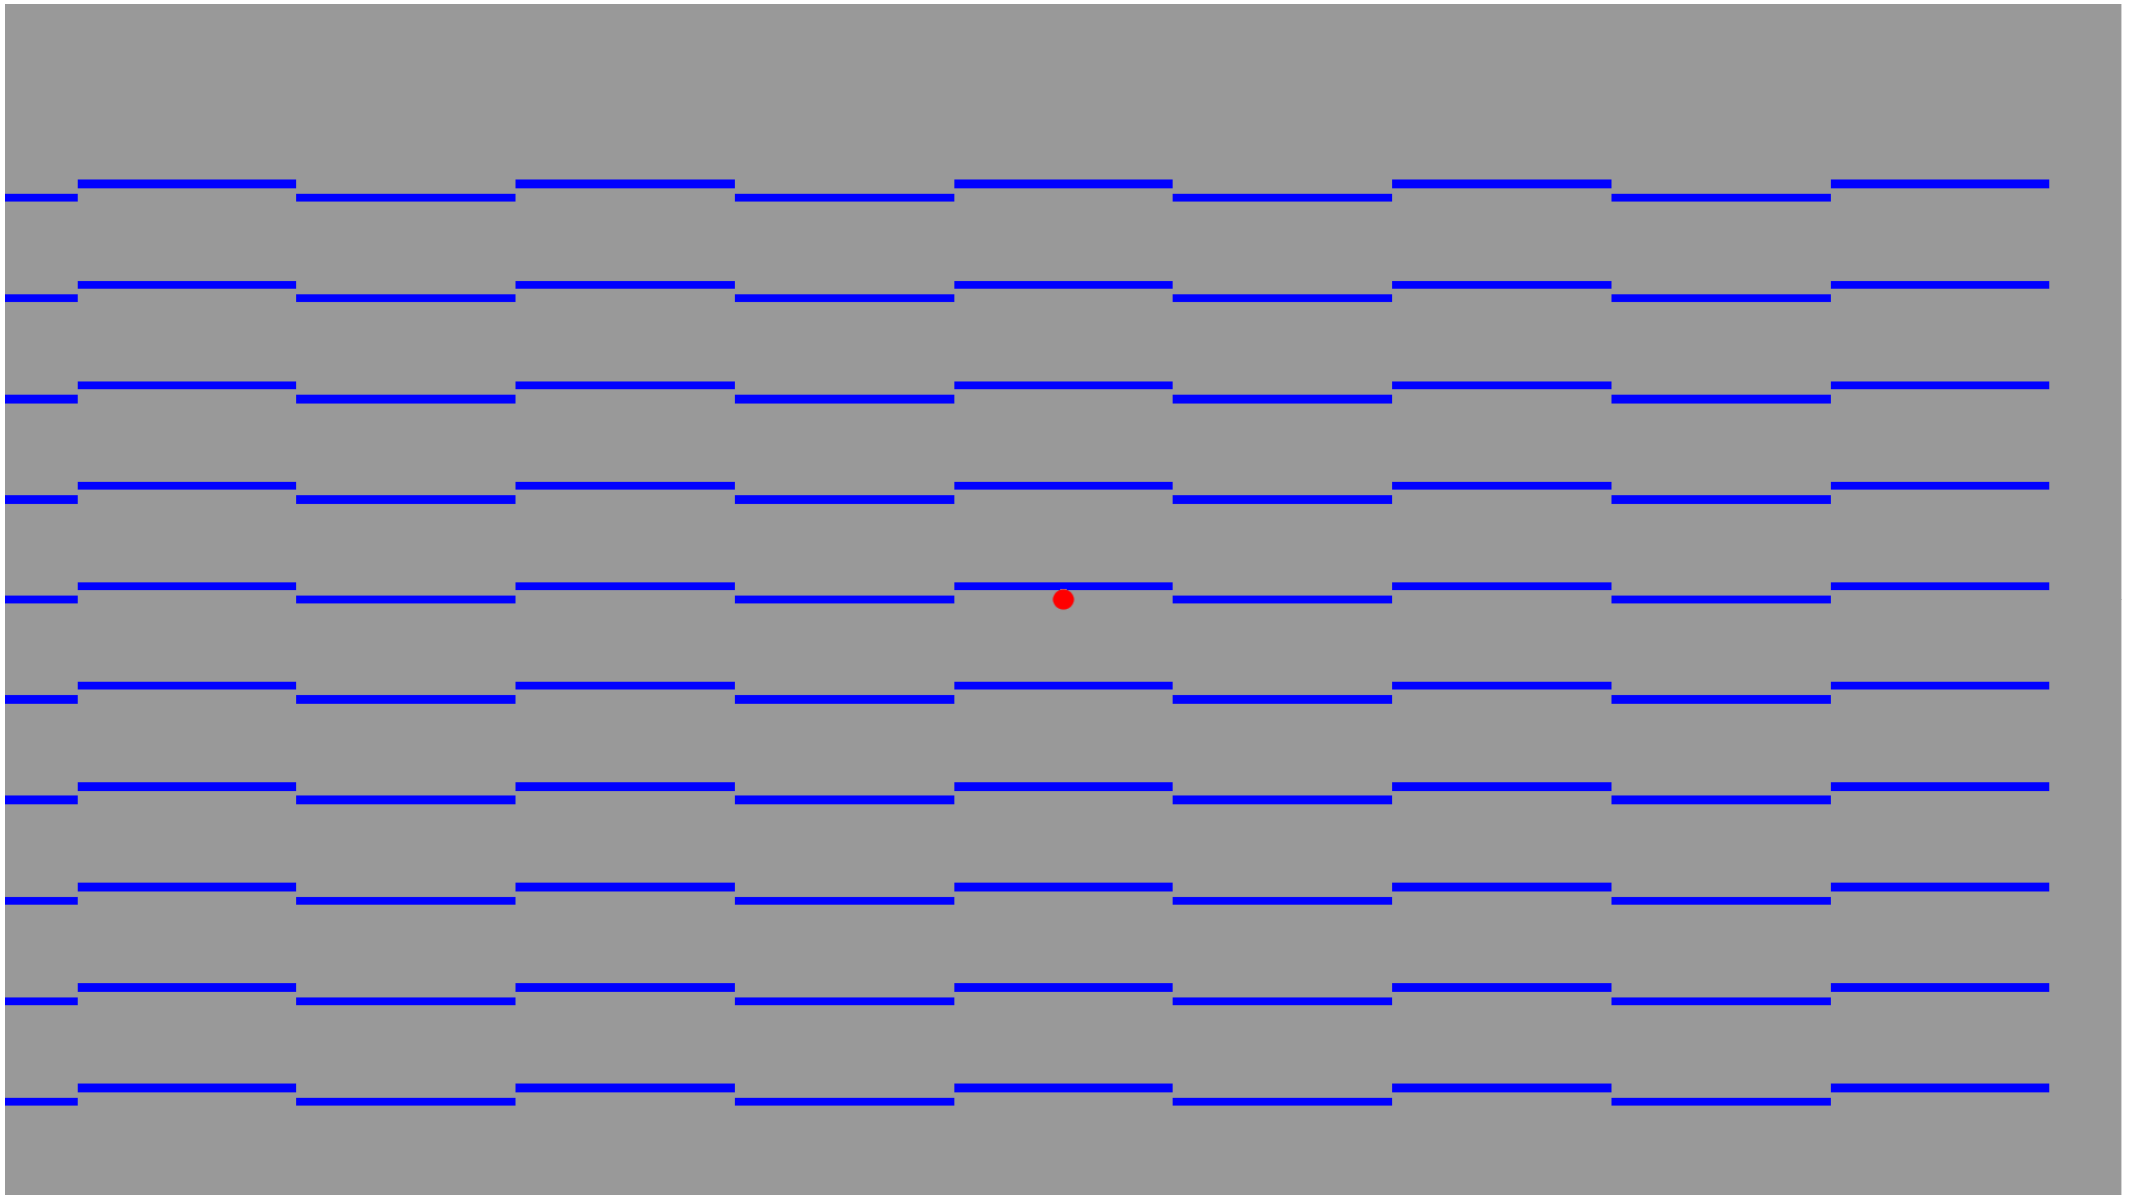

with illusory contour  
Line length: 10 degree  
Number of Line: 10

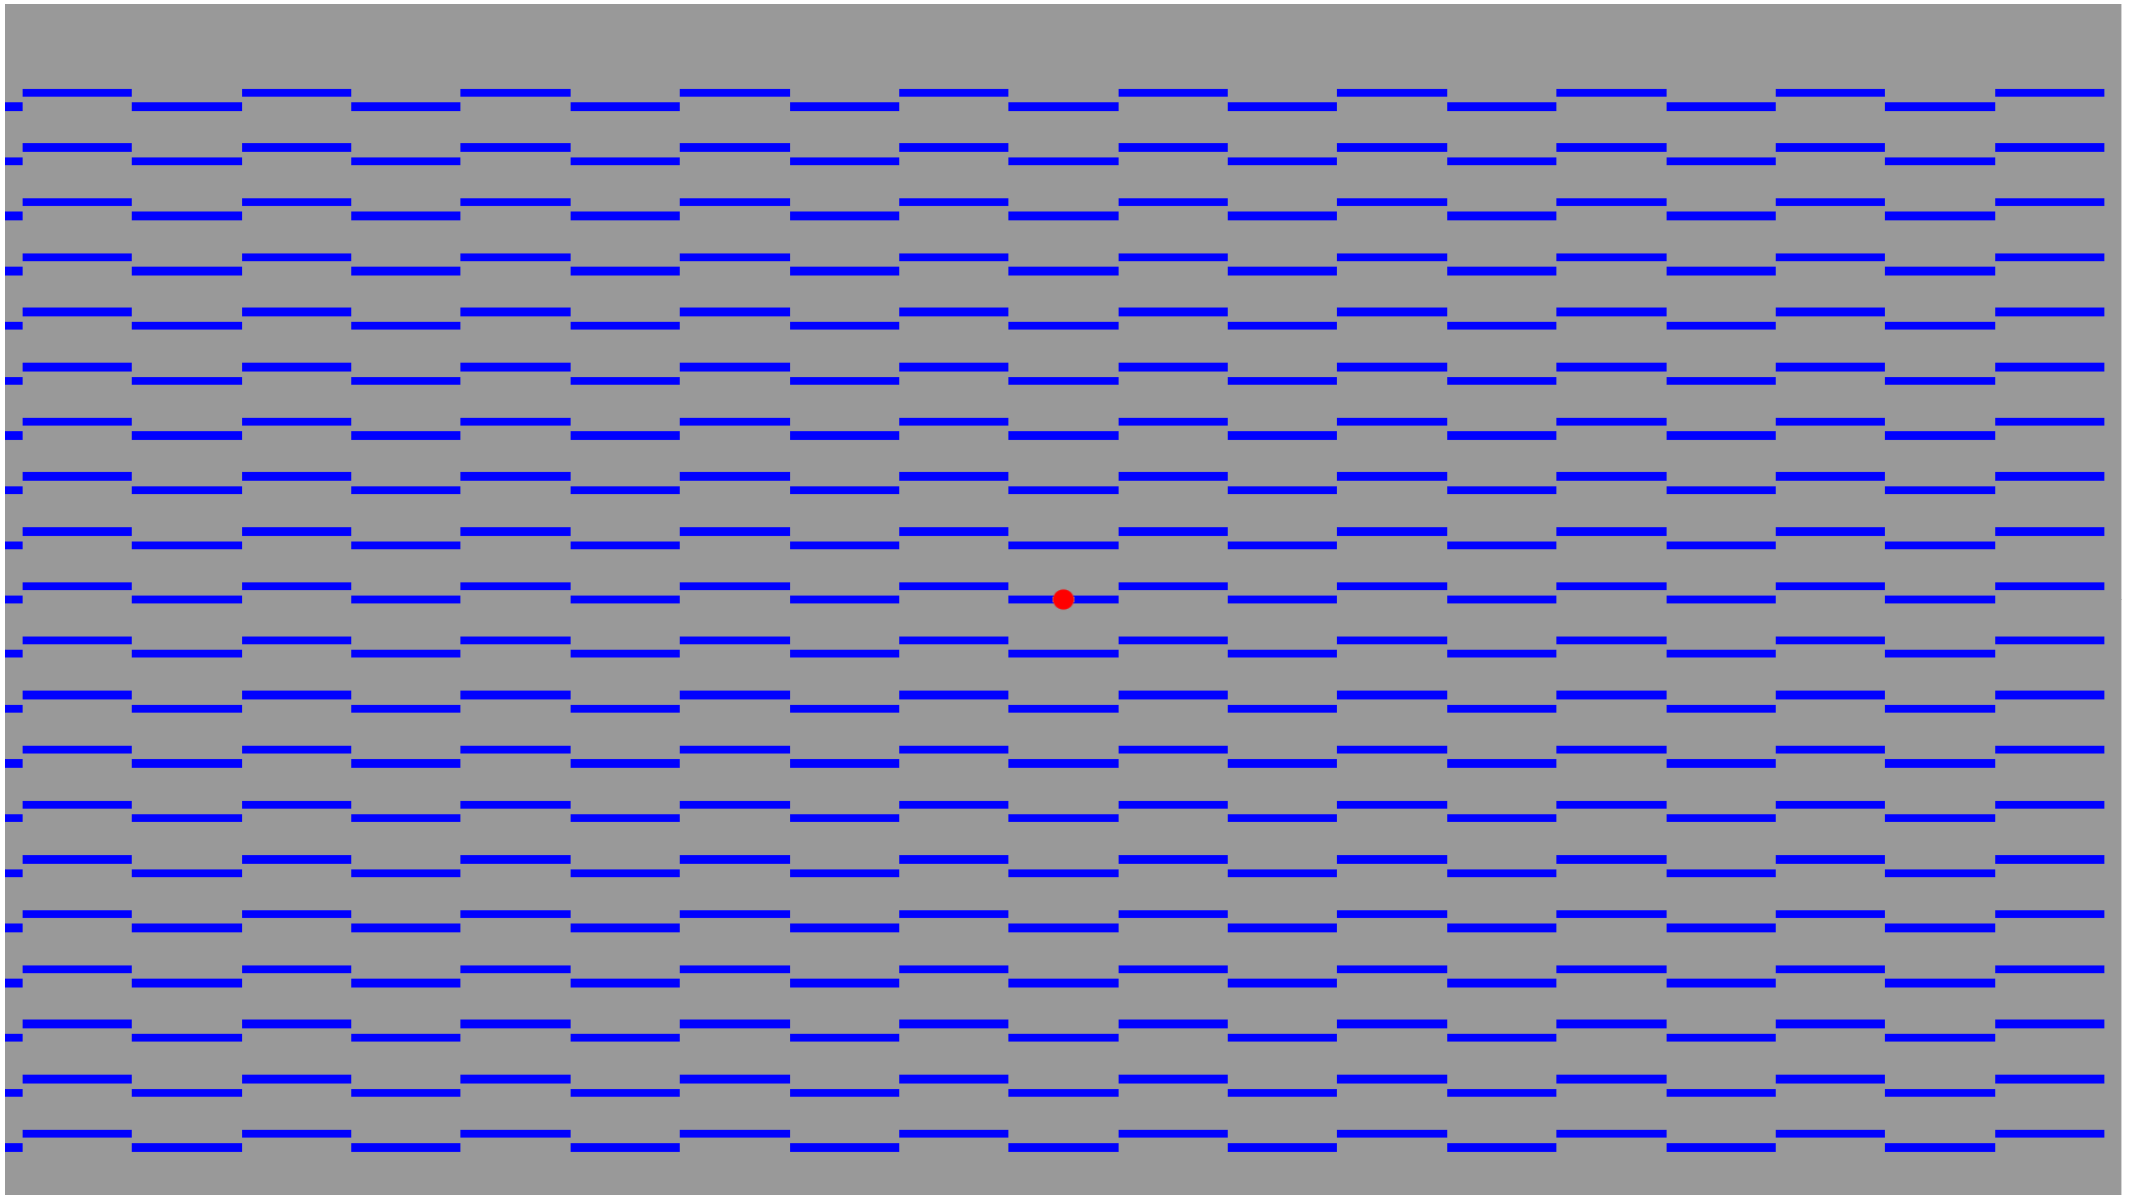

with illusory contour  
Line length: 5 degree  
Number of Line: 20

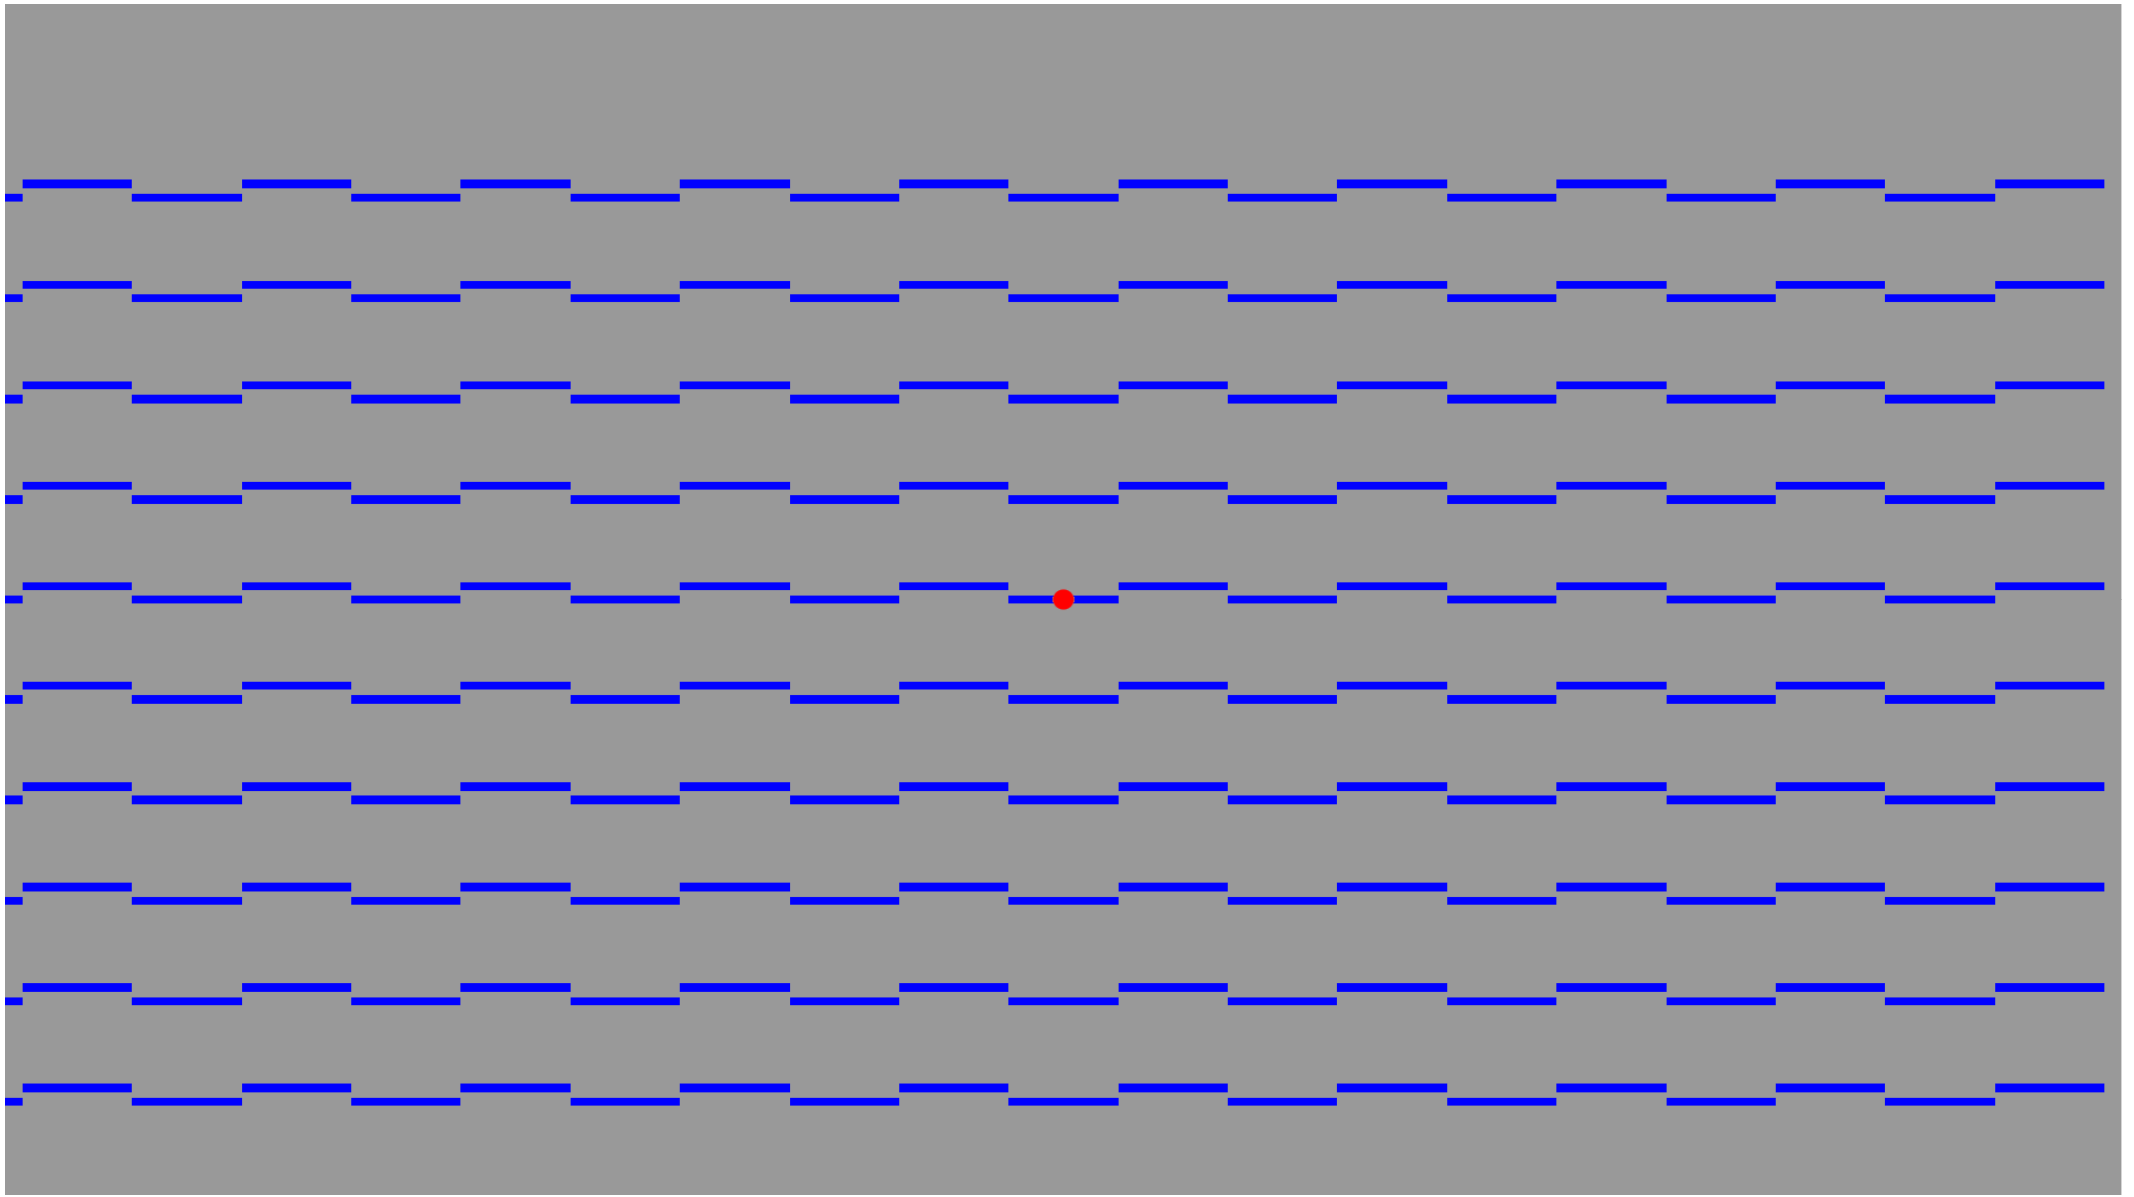

with illusory contour  
Line length: 5 degree  
Number of Line: 10

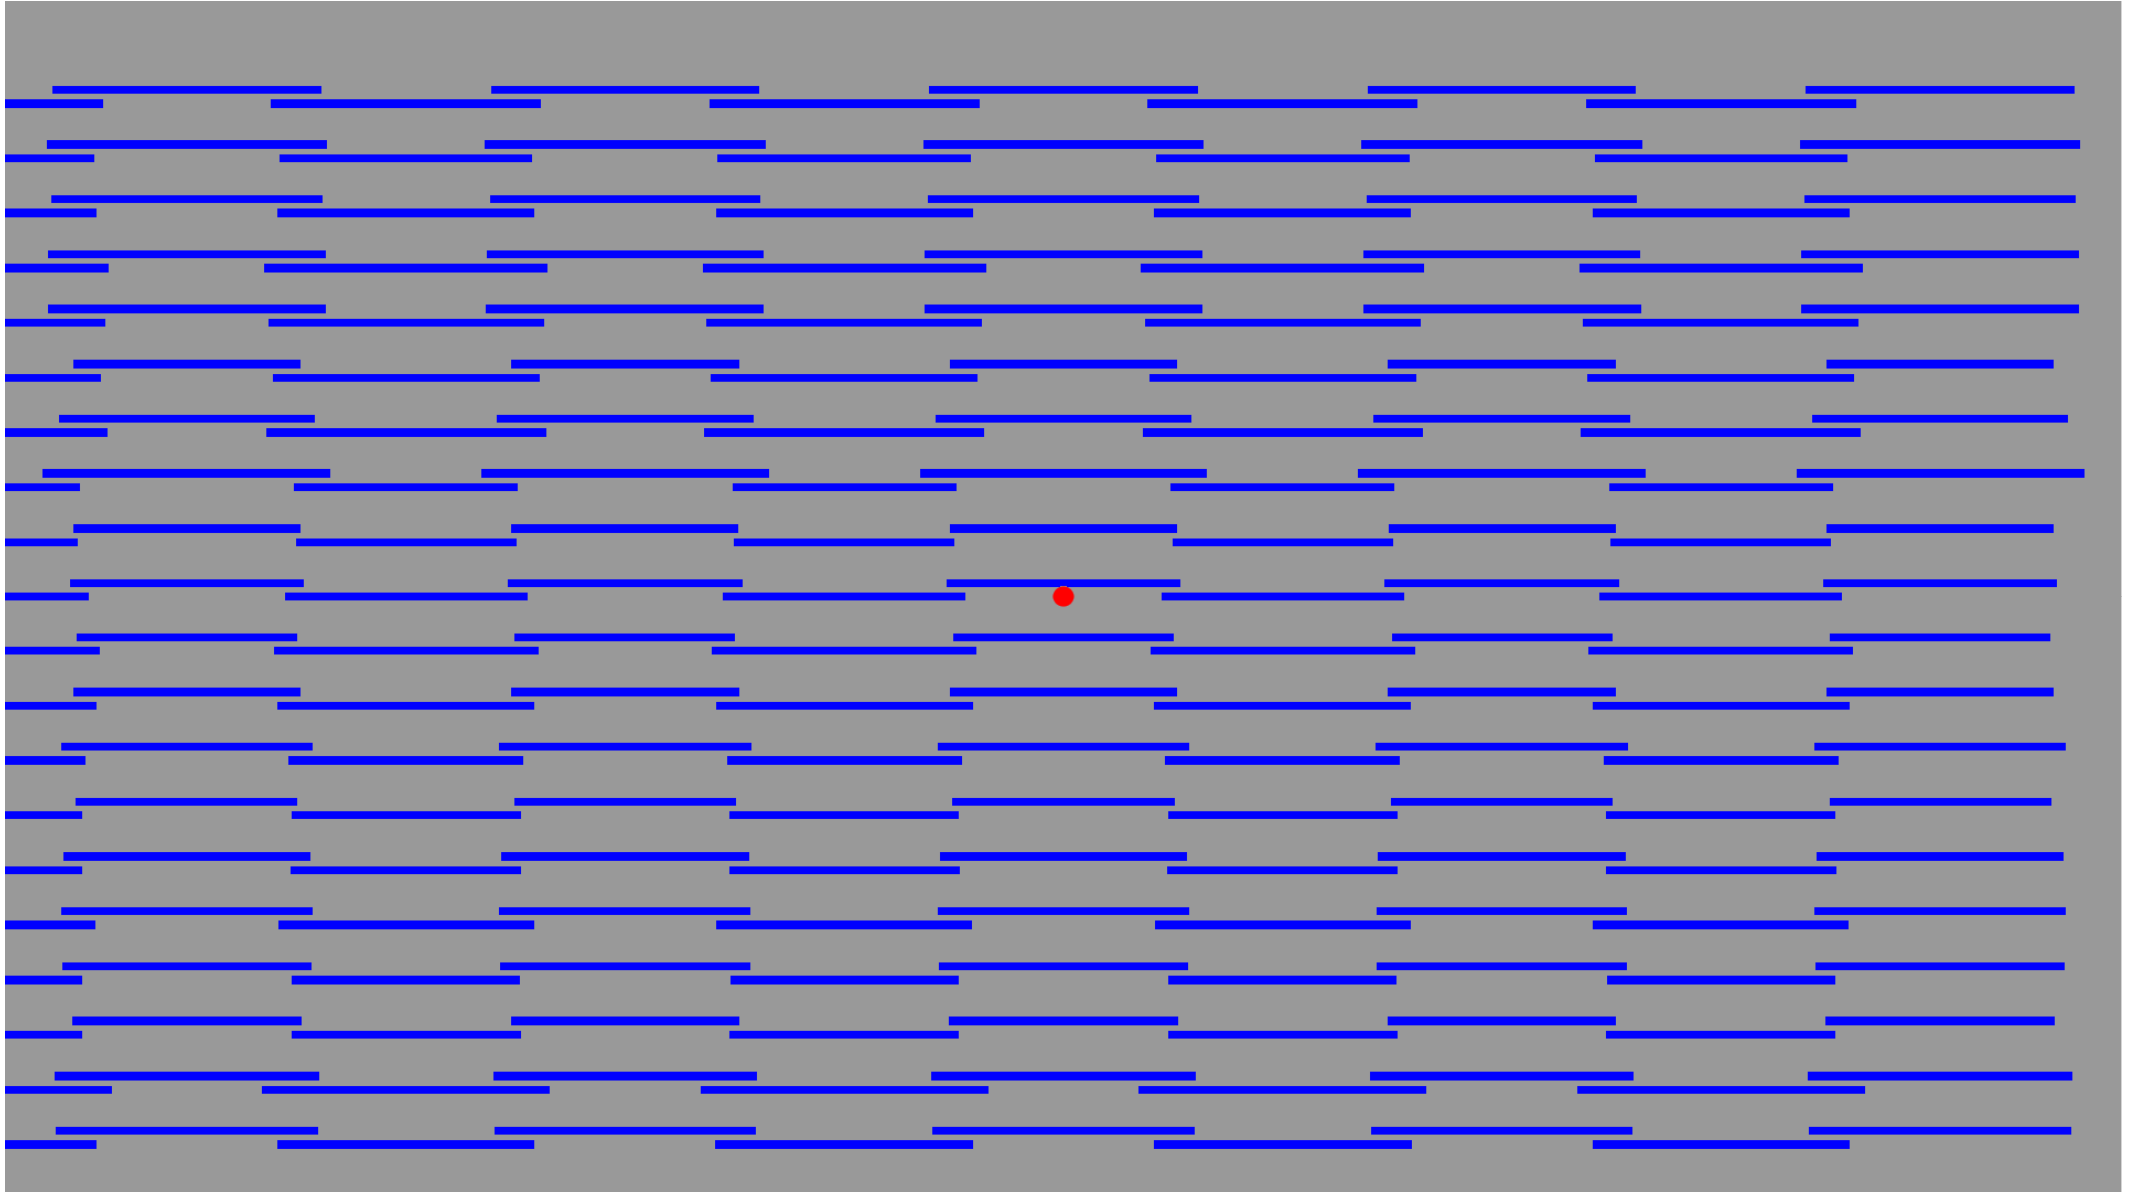

without illusory contour  
Line length: 10 degree  
Number of Line: 20

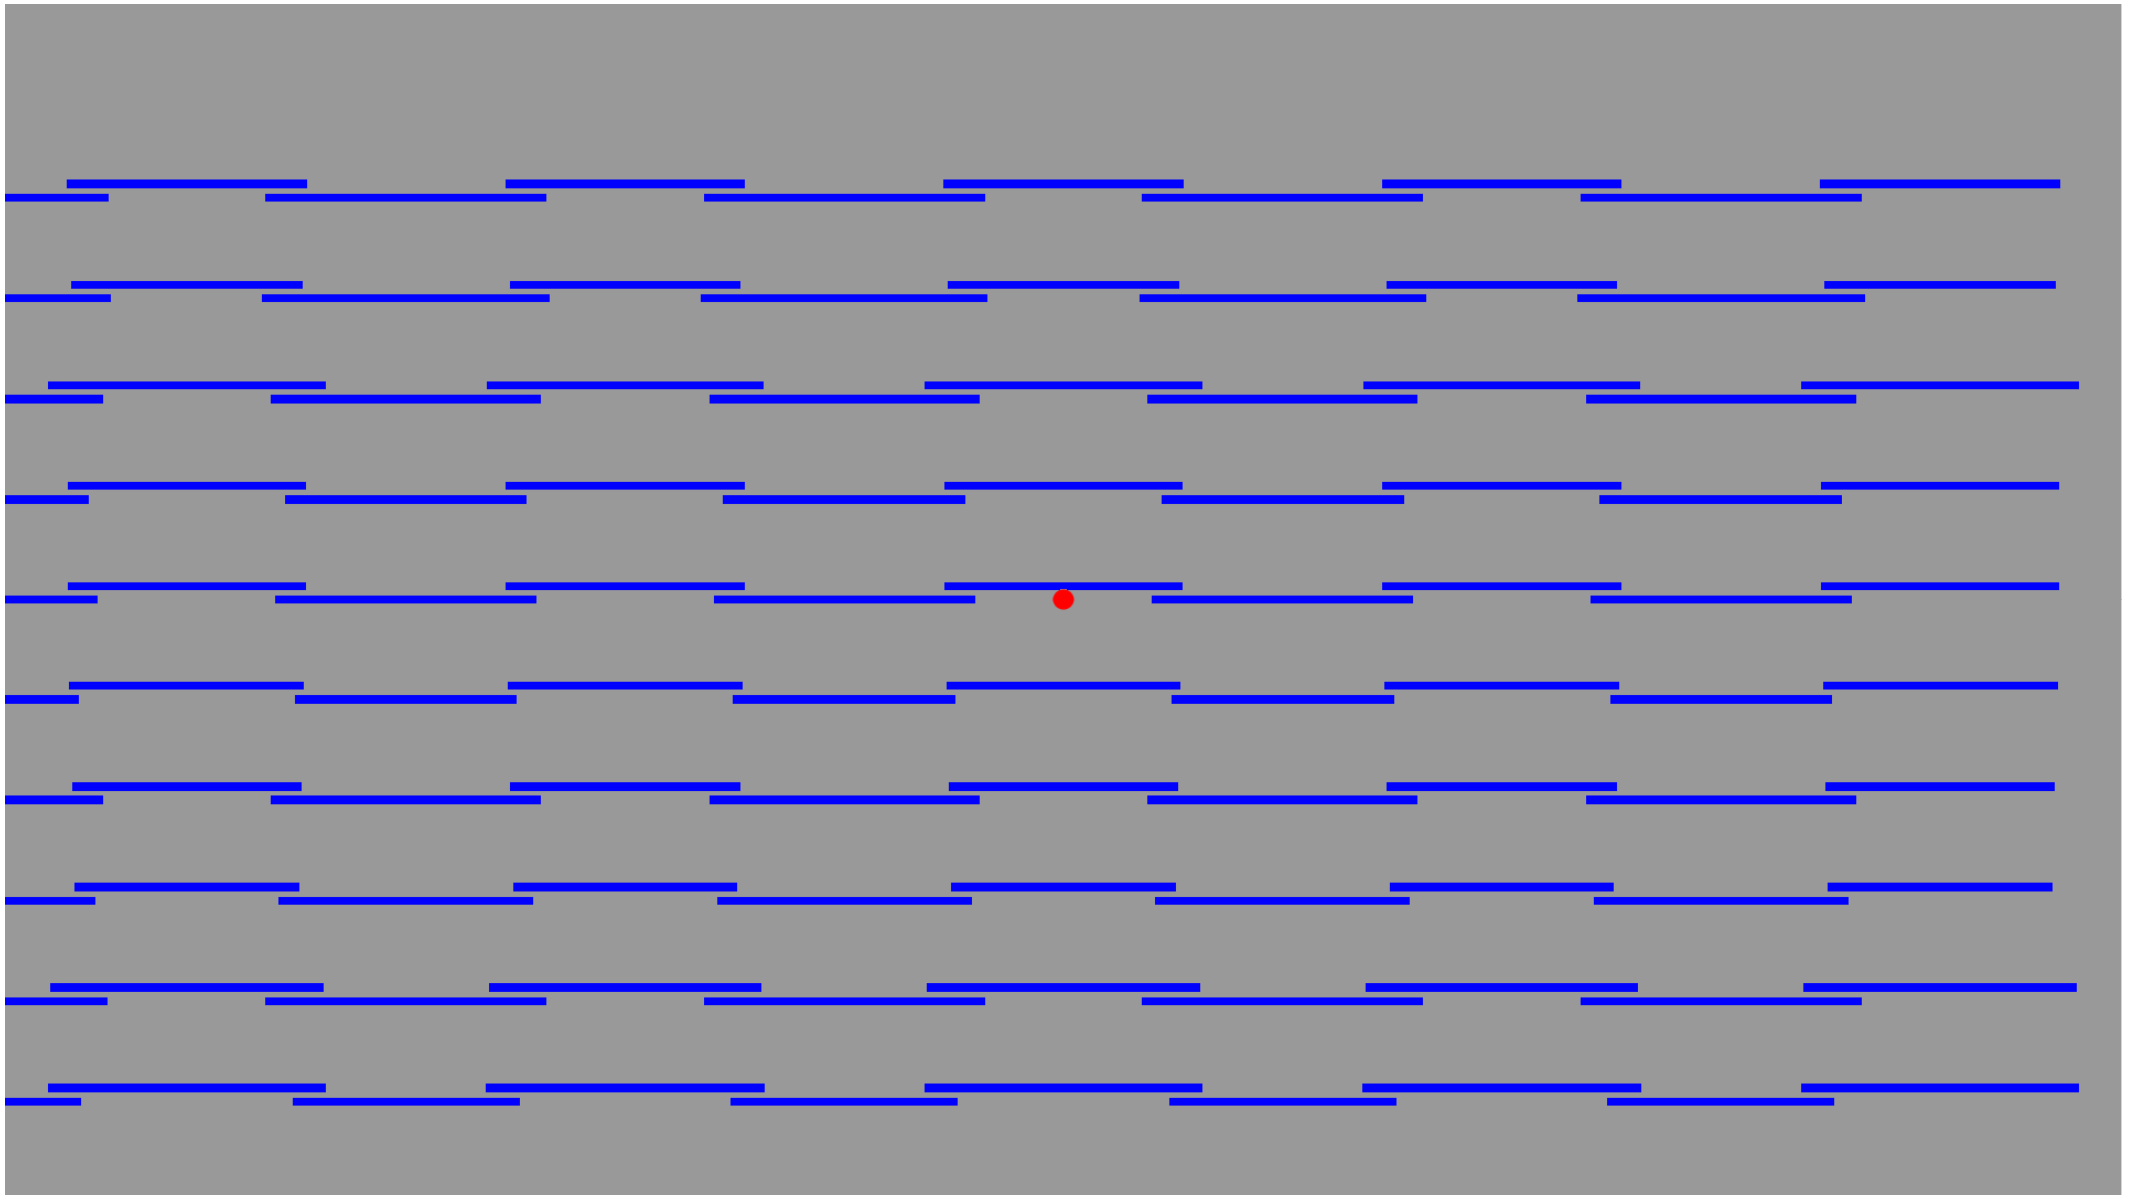

without illusory contour  
Line length: 10 degree  
Number of Line: 10

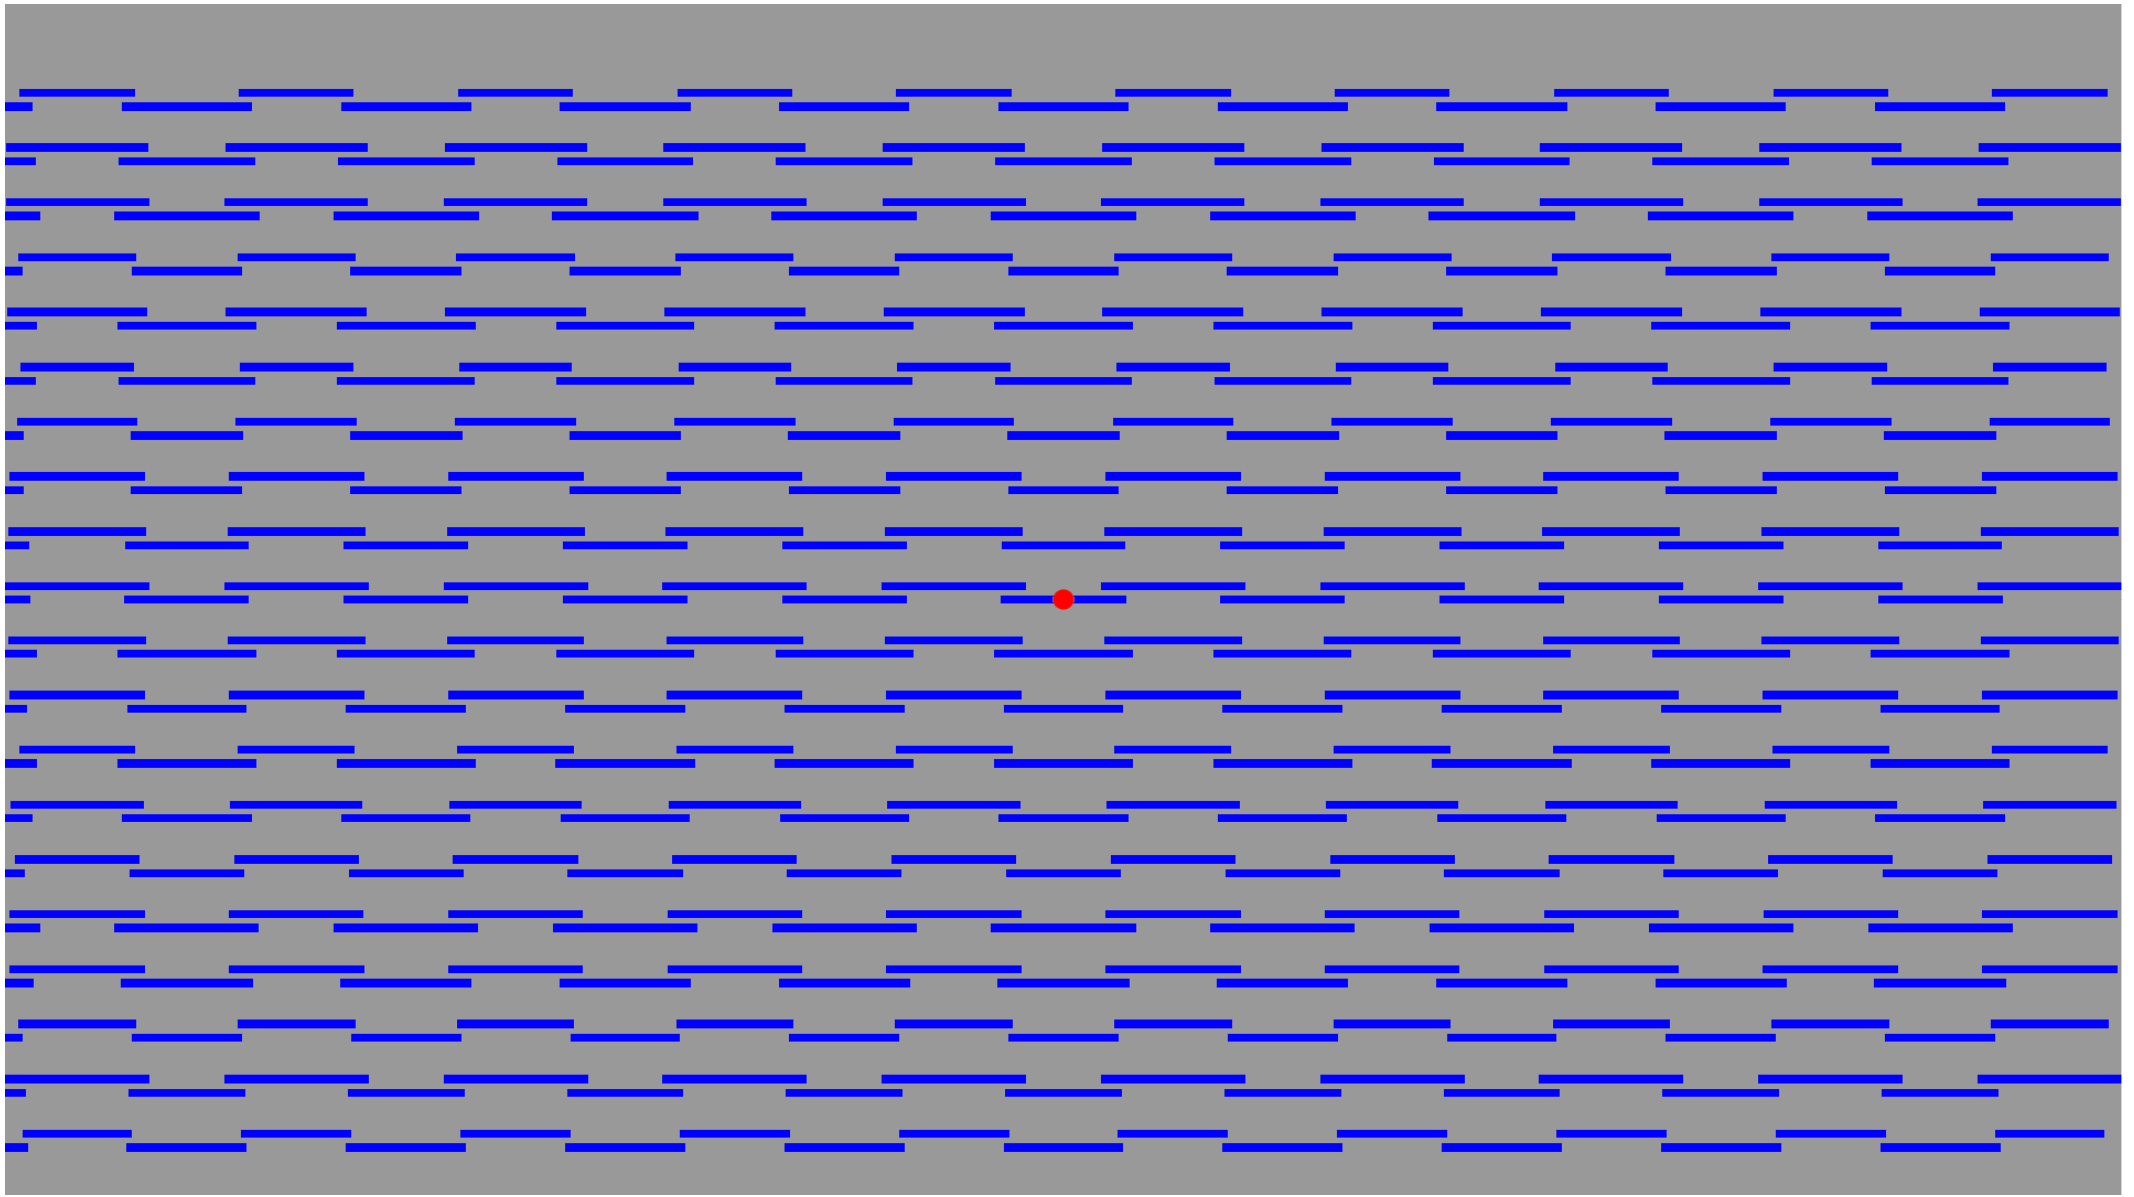

without illusory contour  
Line length: 5 degree  
Number of Line: 20



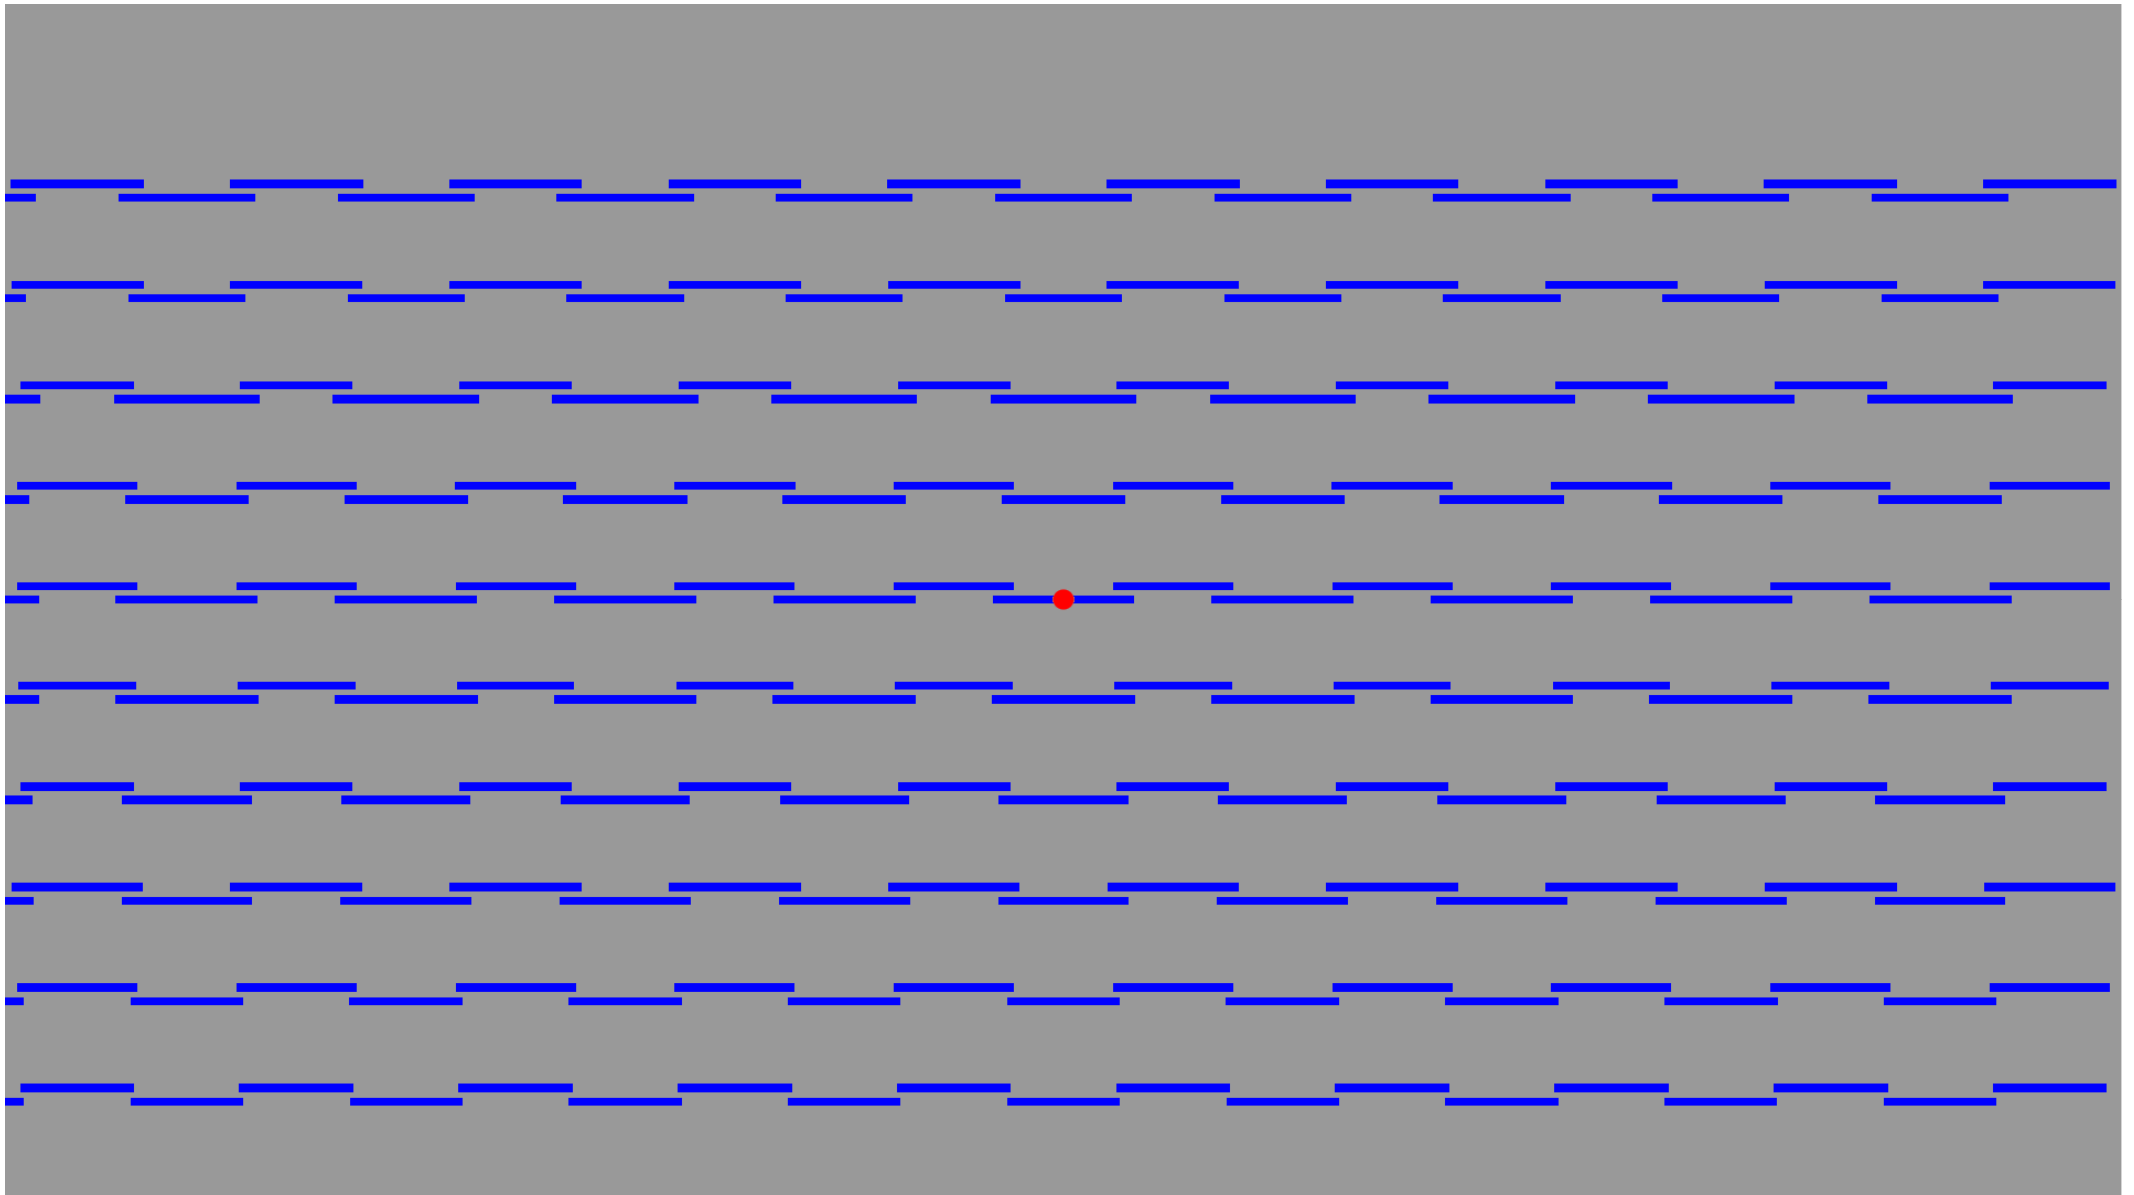

without illusory contour  
Line length: 5 degree  
Number of Line: 10
